# Supplementary material for: Transcriptional Analysis of Microcystis aeruginosa Co-Cultured with Algicidal Bacteria Brevibacillus laterosporus
Source: MDPI journal article supplement (doi:10.3390/ijerph18168615), 2021-08-15
Supplement: s1 [file s1]

**Supplementary table 1.** PCR primer pairs used in this study.

| Gene id | Gene name | Forward Sequence (5'-3') | Reverse Sequence (5'-3') |
|---------|-----------|--------------------------|--------------------------|
| RS02885 | psaA      | ACACTTGGATCGGTGGCTTC     | GCATGGTGTCTGTTGTGAATGT   |
| RS02890 | psaB      | ATCGCTTACACCGCCTATCC     | AACCACGAGCGTCTAAAGCA     |
| RS12310 | FER       | GAAGCAGGACTGGACTTACCT    | CAGAGGTAGGATAGGCGACG     |
| RS08000 | Ndufs1    | GAAGTGGCGGAAGGAATGGT     | TCGCTTGGGAAAACGGTAGG     |
| RS09740 | atpF1D    | GGACCAGTGCCAATCCCTATT    | CCGGTCAGGGTTTTCACTTTG    |
| RS13450 | CYC6      | GTATGGCTCGTCCCGCTTTA     | GCATCGCACCGTTACCTTTG     |
| RS02415 | Y755      | GGCCTATCCTTTGGTGTCGG     | TTCAGAGTGCGGAGGGTTTC     |
|         | 16S rRNA  | CTAAAGGCGGTGGAAACTGG     | CGGCTAGGACTACAGGGGTATCT  |
